# Supplementary material for: Facile preparation of Chevreul's salt (Cu2SO3·CuSO3·2H2O) mesocrystalline microspheres and their high photocatalytic activity
Source: Royal Society of Chemistry journal article supplement (doi:10.1039/c5ce01044f), 2015-01-01
Supplement: c5ce01044f1.pdf [file c5ce01044f1.pdf]

## Supporting Information

### Facile preparation of Chevrel's salt ( $\text{Cu}_2\text{SO}_3 \cdot \text{CuSO}_3 \cdot 2\text{H}_2\text{O}$ )

### mesocrystalline microspheres and its high photocatalytic activity†

Mingyun Guan,\*<sup>a</sup> Yan Jian,<sup>a</sup> Jianhua Sun,<sup>a</sup> Tongming Shang,<sup>a</sup> Qi Liu,<sup>b</sup> and Zheng Xu\*<sup>c</sup>

**SI-1** Temporal UV-vis absorption spectral changed for the various dyes solution over  $\text{Cu}_2\text{SO}_3 \cdot \text{CuSO}_3 \cdot 2\text{H}_2\text{O}$  as a function of UV irradiation time from 0 to 3 h respectively

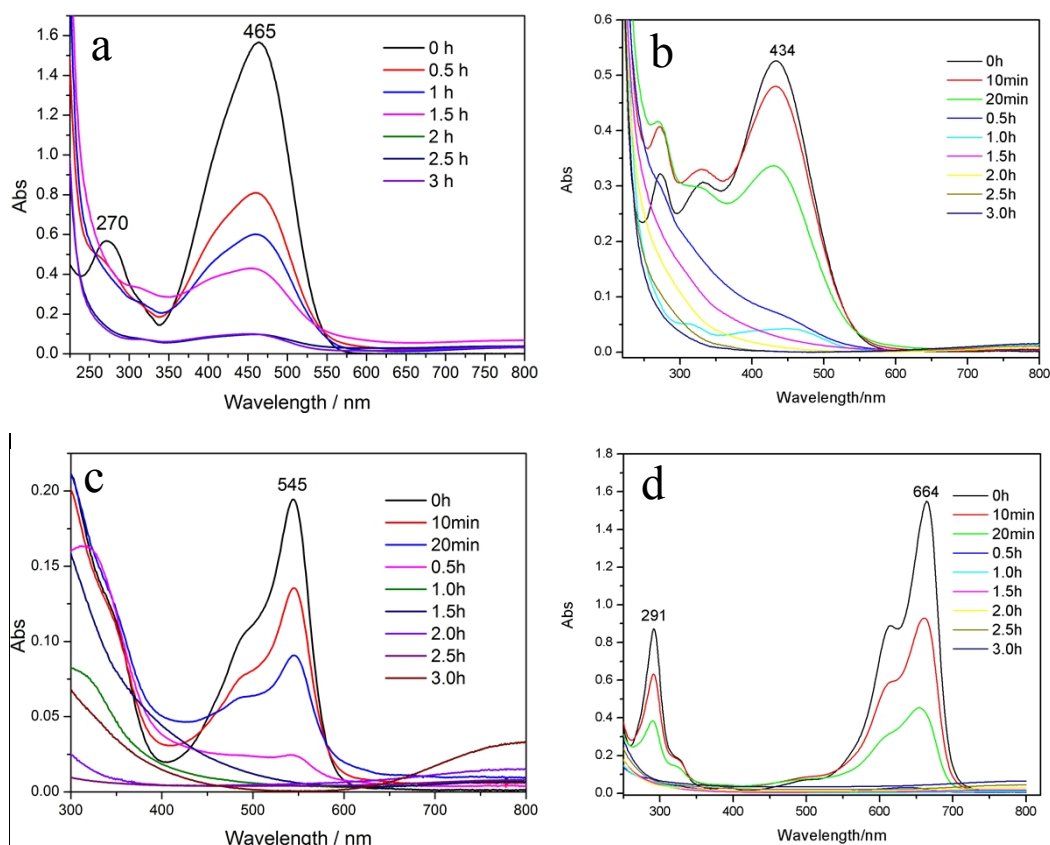

a) methyl orange, b) thymol blue, c) acid fuchsin, d) methyl blue.

**SI-2** Pore-size distribution isotherms of the prepared  $\text{Cu}_2\text{SO}_3 \cdot \text{CuSO}_3 \cdot 2\text{H}_2\text{O}$  mesocrystalline microspheres.

<sup>a</sup> Jiangsu Key Laboratory of Precious Metals Chemistry, School of Chemistry and Environmental Engineering, Jiangsu University of Technology, Changzhou, 213001, P. R. China, E-mail: [guanmy@jsut.edu.cn](mailto:guanmy@jsut.edu.cn)

<sup>b</sup> School of Petrochemical Engineering, Changzhou University, Changzhou 213164, P. R. China.

<sup>c</sup> State Key Laboratory of Coordination Chemistry, School of Chemistry and Chemical Engineering, Nanjing University, Nanjing, 210093, P. R. China, E-mail: [zhengxu@nju.edu.cn](mailto:zhengxu@nju.edu.cn), Fax: +86-25-83314502.

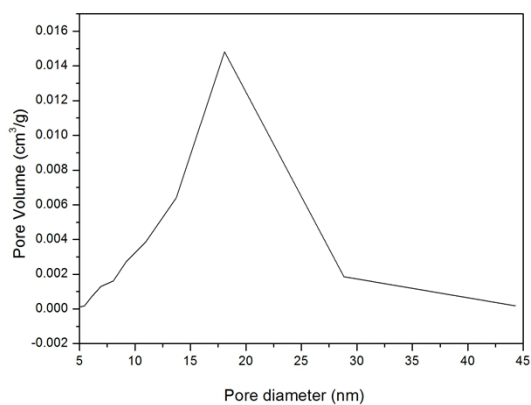

### SI-3 Synthesis of $\text{Cu}_2\text{SO}_3 \cdot \text{CuSO}_3 \cdot 2\text{H}_2\text{O}$ irregular microparticles

20 mL  $\text{Na}_2\text{SO}_3$  ( $7.6 \text{ mmol} \cdot \text{L}^{-1}$ ) aqueous solution was added into 20 mL  $\text{CuAc}_2$  ( $4.67 \text{ mmol} \cdot \text{L}^{-1}$ ) aqueous solution in a beaker under magnetic stirring at the ambient temperature. The slurry immediately formed. After stirring for 15 min,  $\text{H}_2\text{SO}_4$  solution with pH value 1 was dropwise added into the above mixed solution to adjust pH value to the range of 4-4.6. The brick red precipitates at the bottom of the beaker were collected, washed with distilled water, and then dried in a vacuum oven at  $80^\circ\text{C}$ .
